# Supplementary material for: Photo-induced conversion from supramolecular to covalently linked polymers based on anthracene-appended amphiphiles
Source: Royal Society of Chemistry journal article supplement (doi:10.1039/c5py00476d), 2015-01-01
Supplement: c5py00476d1.pdf [file c5py00476d1.pdf]

# *Supporting Information*

## **Photo-induced conversion from supramolecular to covalently linked polymers based on anthracene-appended amphiphile**

Xun Zhang,<sup>a</sup> Yuxia Gao,<sup>a</sup> Yuan Lin,<sup>b</sup> Jun Hu<sup>b\*</sup> and Yong Ju<sup>a\*</sup>

<sup>a</sup> Key Lab of Bioorganic Phosphorus Chemistry and Chemical Biology, Ministry of Education, Department of Chemistry, Tsinghua University, Beijing 100084, China; E-mail: juyong@tsinghua.edu.cn.

<sup>b</sup> State Key Lab of Polymer Physics and Chemistry, Changchun Institute of Applied Chemistry, Chinese Academy of Sciences, Changchun 130022, China; E-mail: jhu@ciac.ac.cn.

### **Content**

|                                                      |          |
|------------------------------------------------------|----------|
| <b>1. TEM image of amphiphilic monomer 2</b>         | <b>2</b> |
| <b>2. Characterization of compound 1</b>             | <b>2</b> |
| <b>(1) <sup>1</sup>H NMR spectrum of compound 1</b>  | <b>2</b> |
| <b>(2) <sup>13</sup>C NMR spectrum of compound 1</b> | <b>3</b> |
| <b>(3) EI-MS (+) spectrum of compound 1</b>          | <b>3</b> |
| <b>3. Characterization of compound 2</b>             | <b>4</b> |
| <b>(1) <sup>1</sup>H NMR spectrum of compound 2</b>  | <b>4</b> |
| <b>(2) <sup>13</sup>C NMR spectrum of compound 2</b> | <b>4</b> |
| <b>(3) ESI-MS (+) spectrum of compound 2</b>         | <b>5</b> |

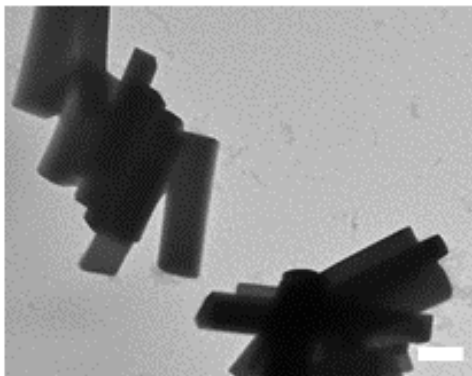

**Fig. S1** TEM images of amphiphilic monomer **2** (0.05 mM). Scale bar is 200 nm.

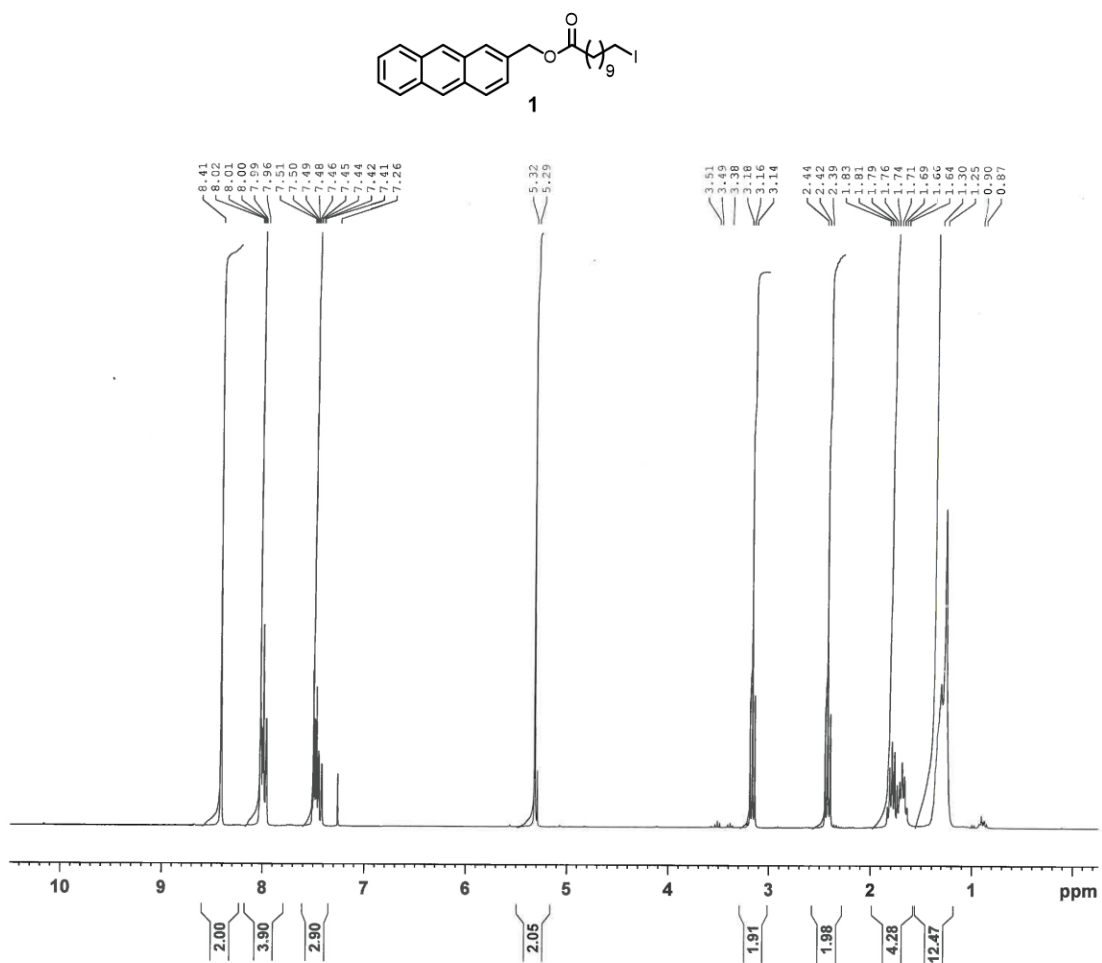

**Fig. S2**  $^1\text{H}$  NMR spectrum of compound **1** (300 MHz,  $\text{CDCl}_3$ )

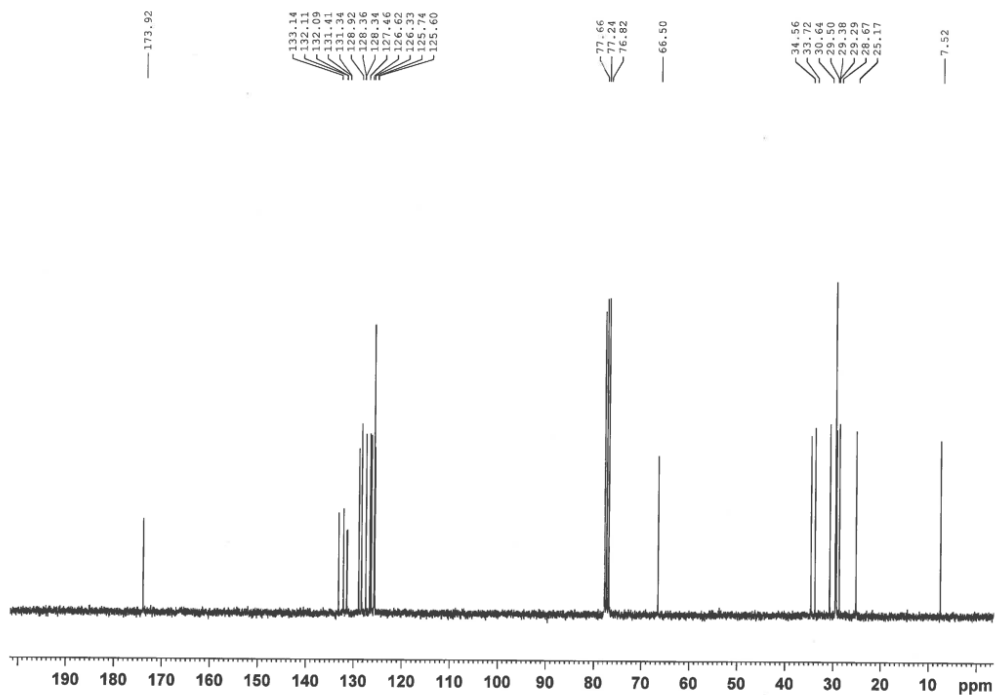

**Fig. S3**  $^{13}\text{C}$  NMR spectrum of compound **1** (75 MHz,  $\text{CDCl}_3$ )

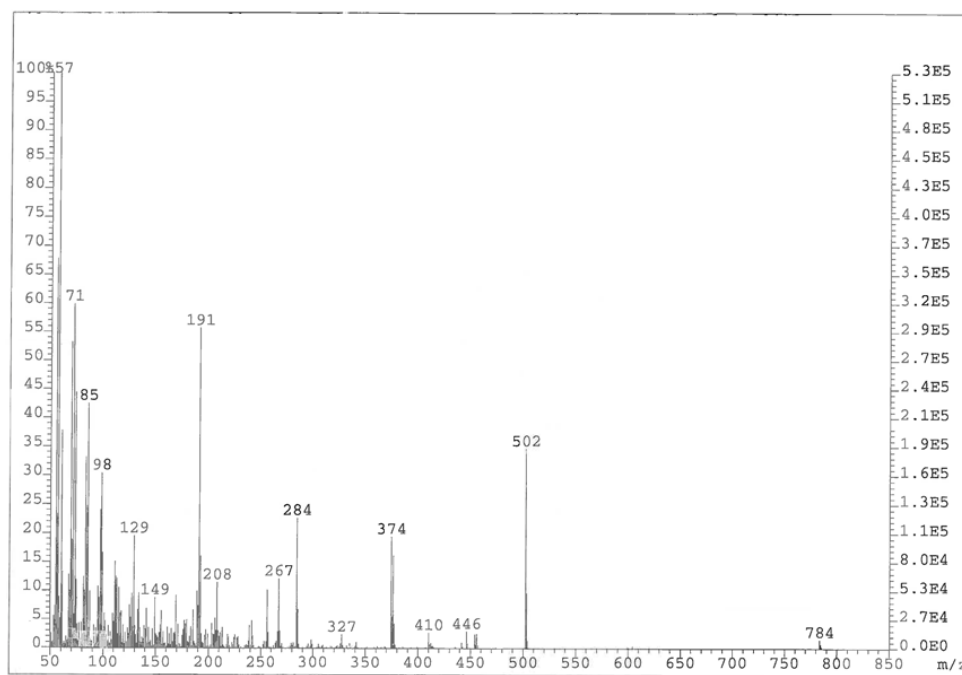

**Fig. S4** EI-MS (+) spectrum of compound **1**

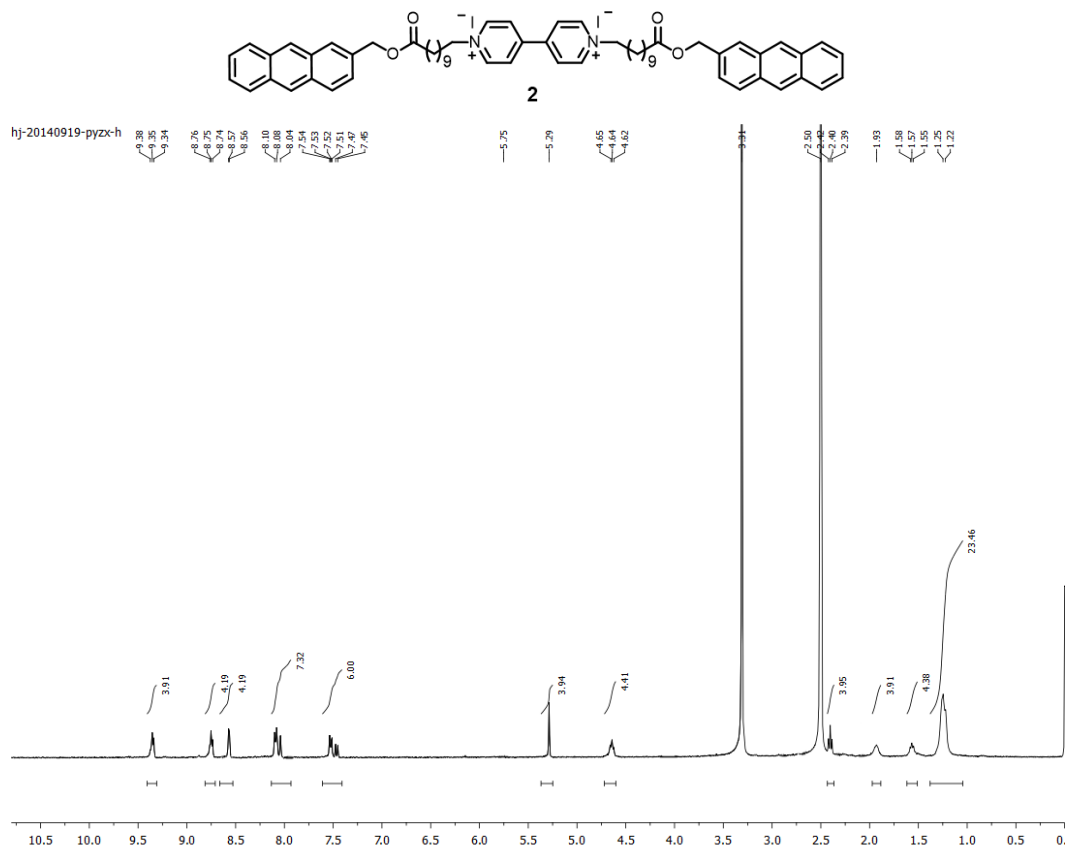

**Fig. S5**  $^1\text{H}$  NMR spectrum of compound **2** (400 MHz,  $d_6$ -DMSO)

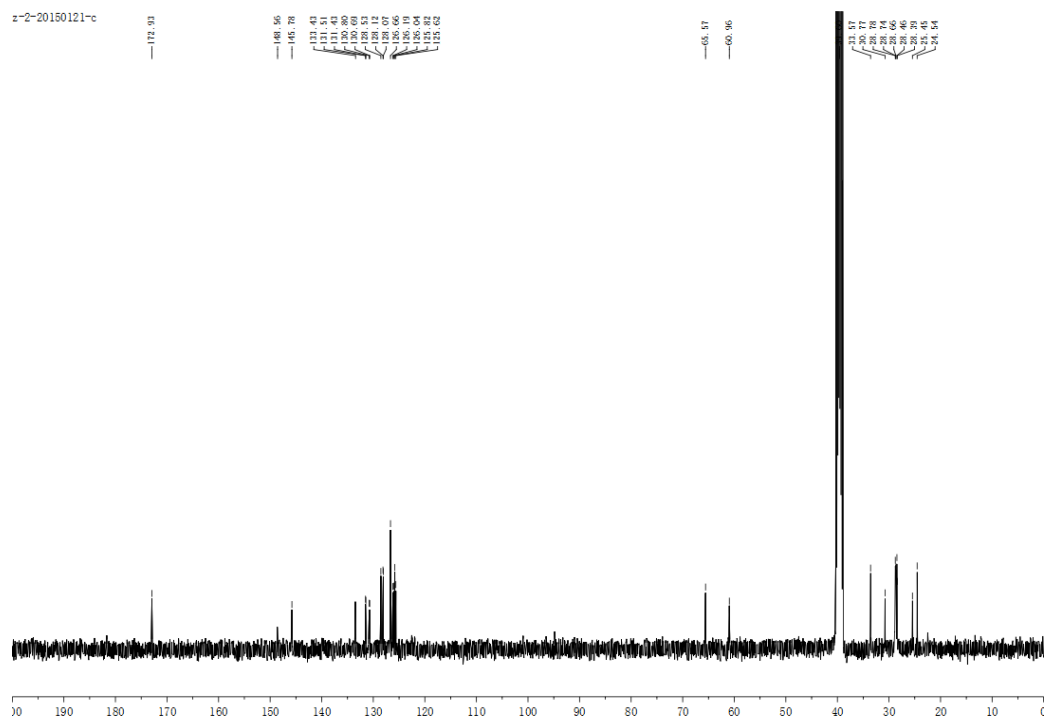

**Fig. S6**  $^{13}\text{C}$  NMR spectrum of compound **2** (100 MHz,  $d_6$ -DMSO)

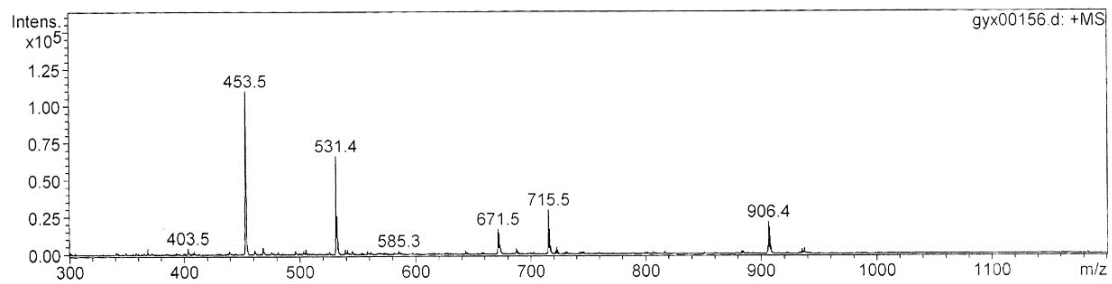

**Fig. S7** ESI-MS (+) spectrum of compound **2**
